# Supplementary material for: Profiling the genome-wide landscape of tandem repeat expansions
Source: bioRxiv or medRxiv preprint supplement (doi:10.1101/361162), 2019-03-14
Supplement: Supplementary file [file 361162-1.pdf]

# Supplementary Figures

## Supplementary Figure 6

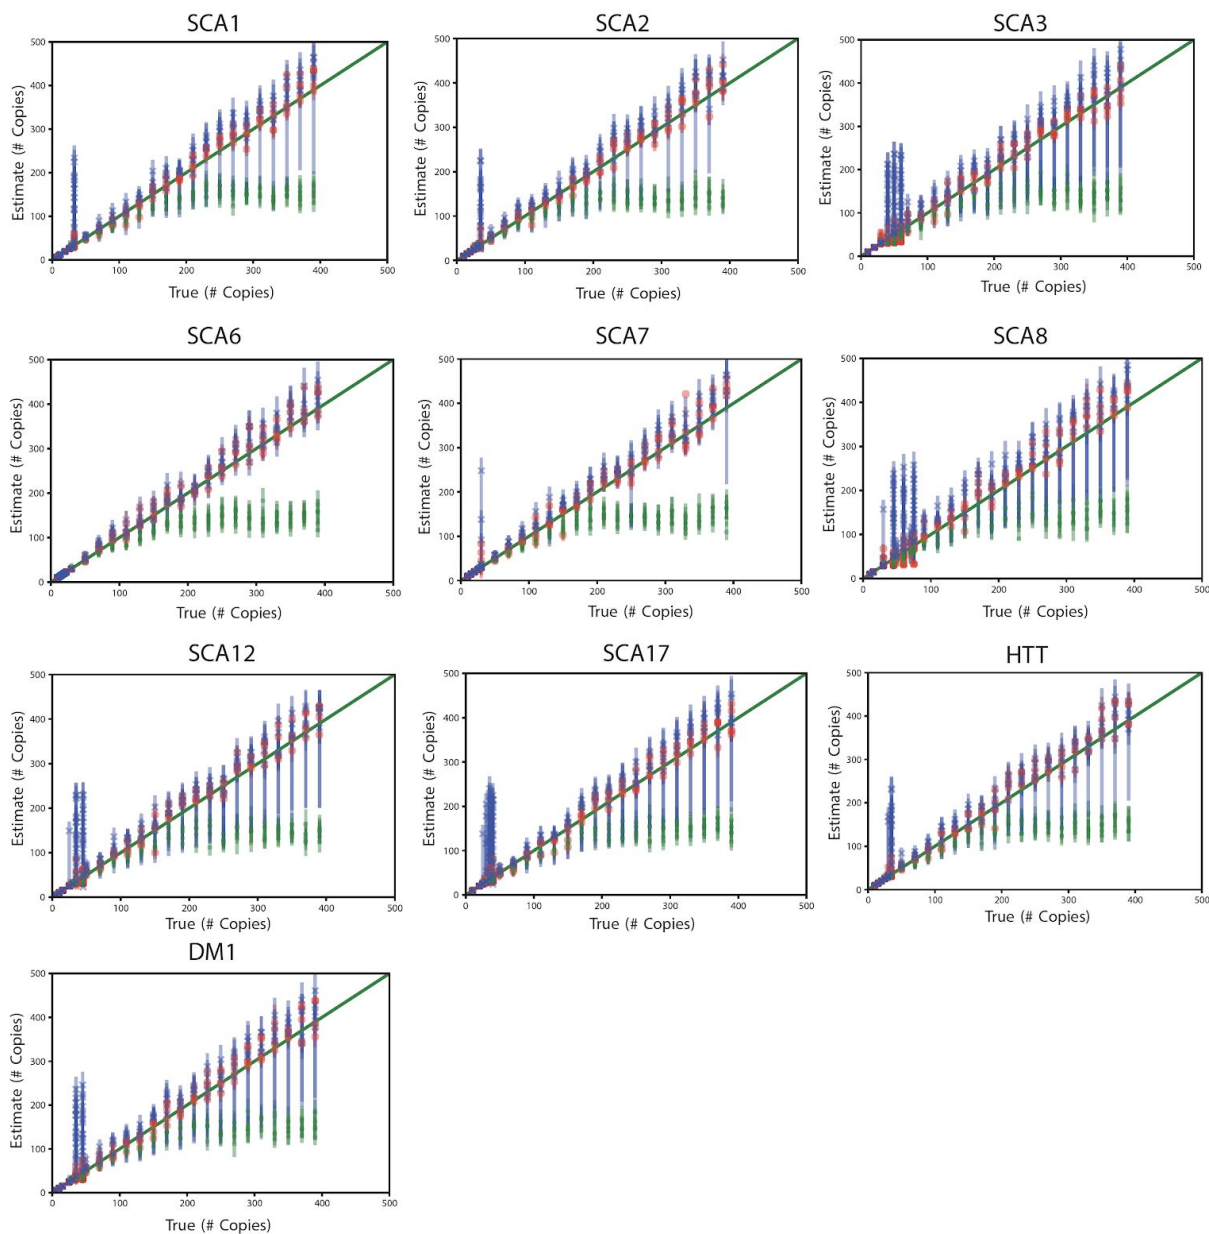

**True vs. estimated repeat count for simulated data.** Plots similar to **Figures 2B-D** are shown for each of the 10 loci analyzed in **Figure 2**. Red=GangSTR, blue=ExpansionHunter, green=TREDPARSE.

Supplementary Figure 7

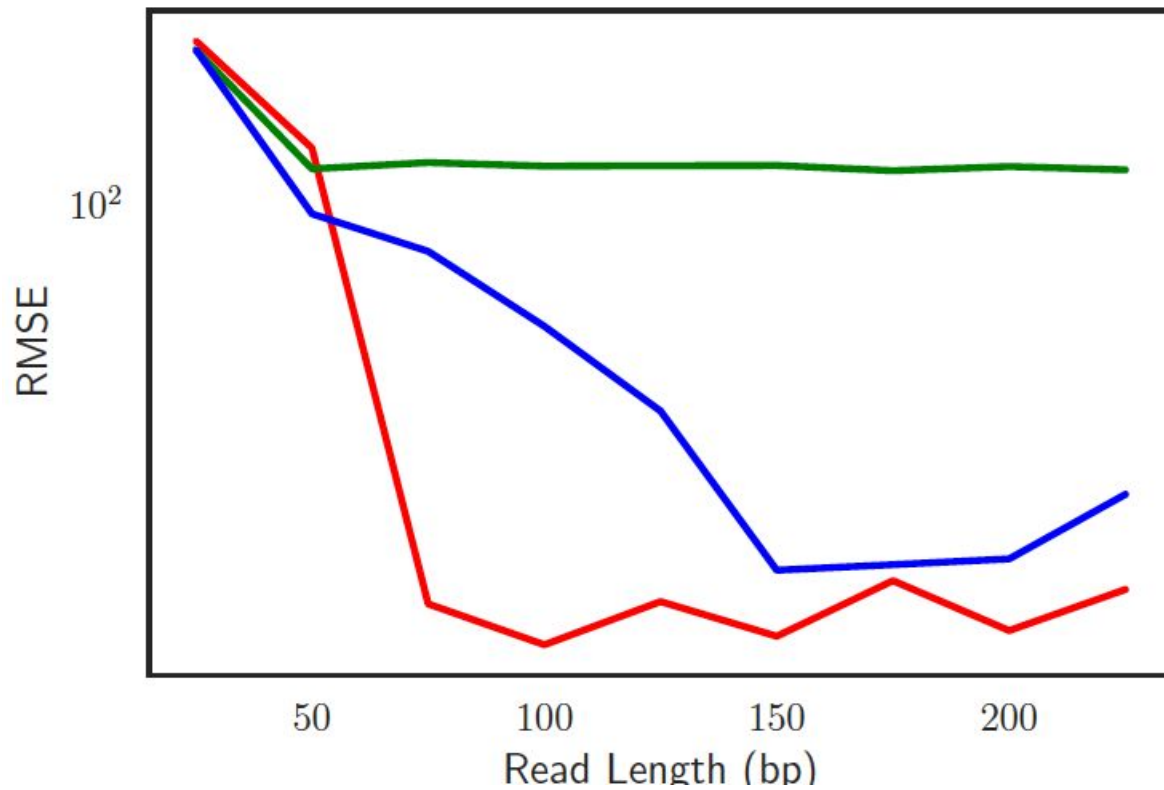

**RMSE as a function of read length.** Results shown for simulated data at the Huntington's Disease locus using simulation parameters described in the main text. Red=GangSTR, blue=ExpansionHunter, green=Tredparse.

Supplementary Figure 8

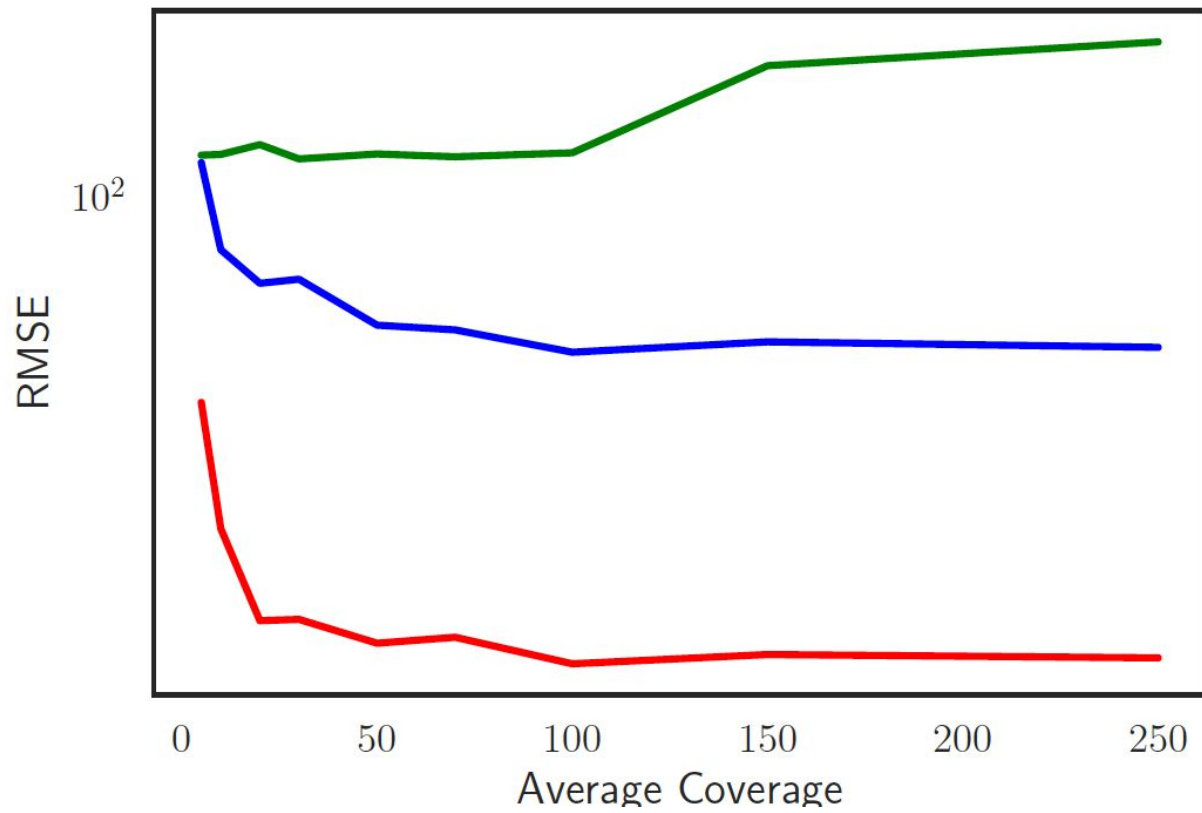

**RMSE as a function of coverage.** Results shown for simulated data at the Huntington's Disease locus using simulation parameters described in the main text. Red=GangSTR, blue=ExpansionHunter, green=Tredparse.

Supplementary Figure 9

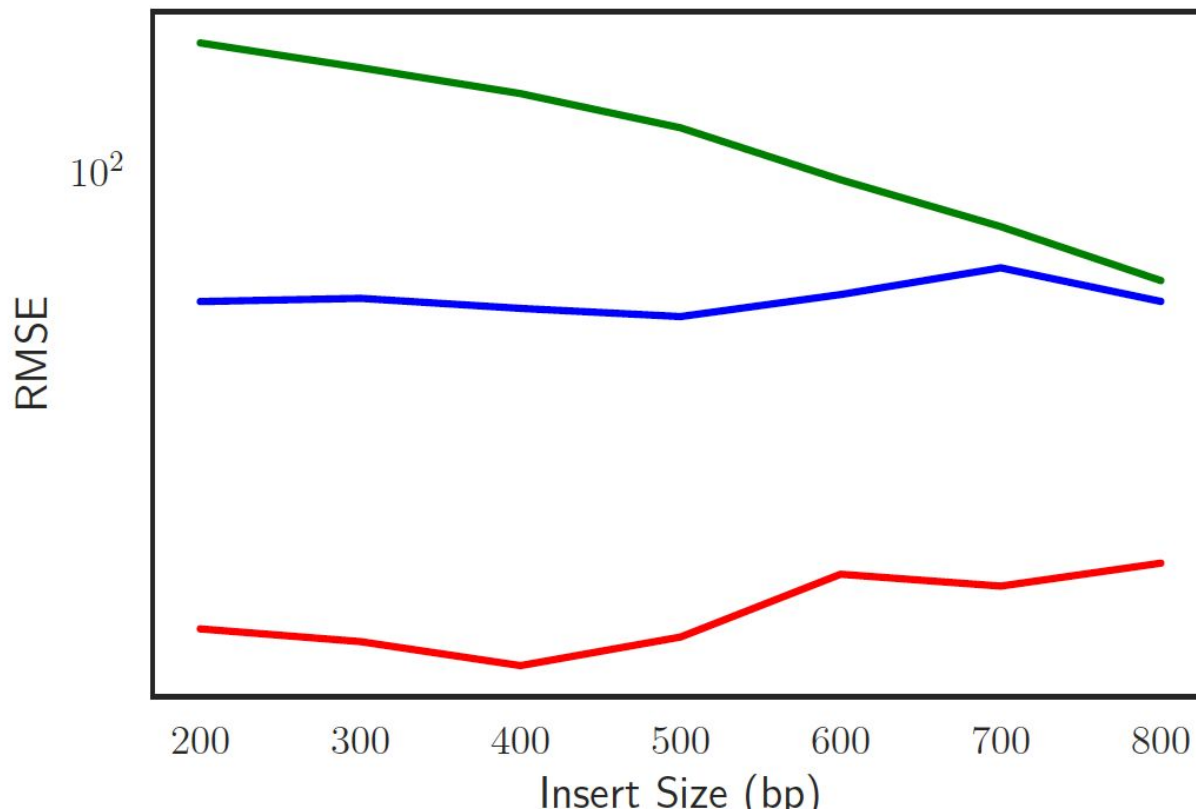

**RMSE as a function of fragment length.** Results shown for simulated data at the Huntington's Disease locus. Red=GangSTR, blue=ExpansionHunter, green=Tredparse.

## Supplementary Figure 10

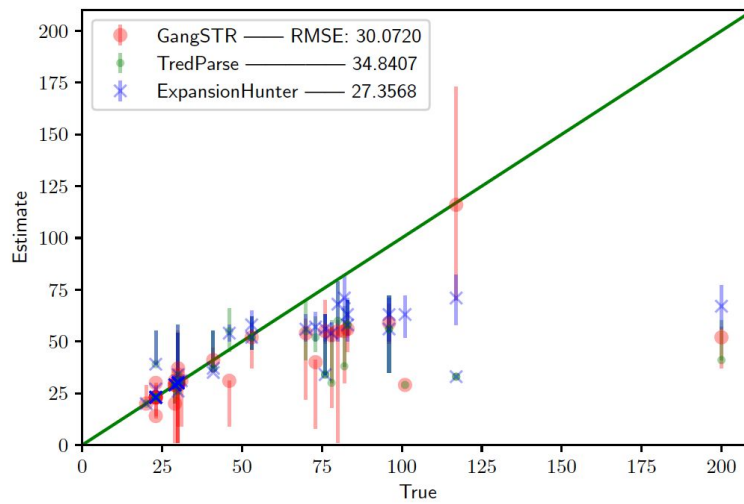

**Comparison of repeat expansion tools at FMR1 using real WGS data.** Dashed gray line gives the mean fragment length. Black solid line gives the diagonal. red=GangSTR; blue=ExpansionHunter; green=Tredparse.

## Supplementary Figure 11

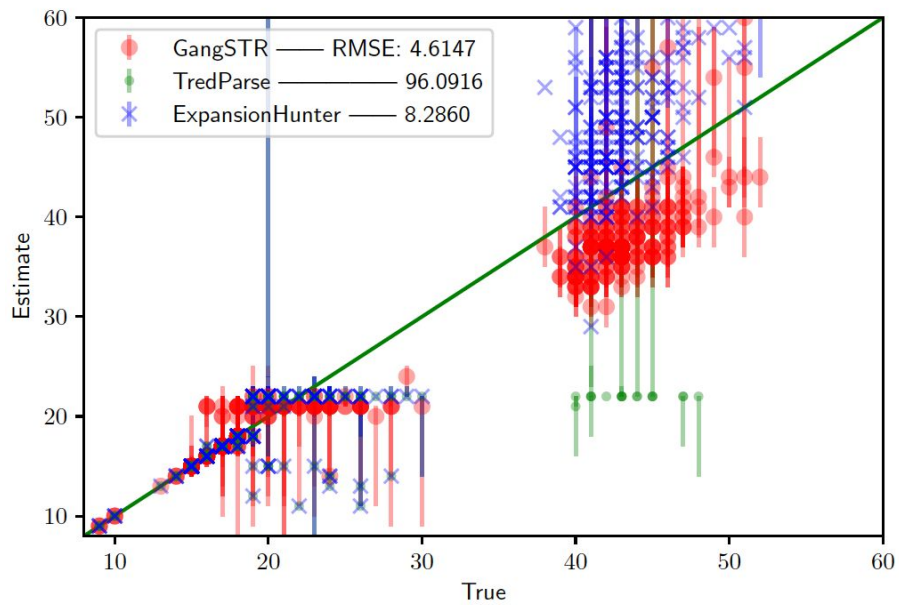

**Comparison of repeat expansion tools at the Huntington's Disease locus using real whole exome sequencing data.** Dashed gray line gives the mean fragment length. Black solid line gives the diagonal. red=GangSTR; blue=ExpansionHunter; green=Tredparse.

### Supplementary Figure 12

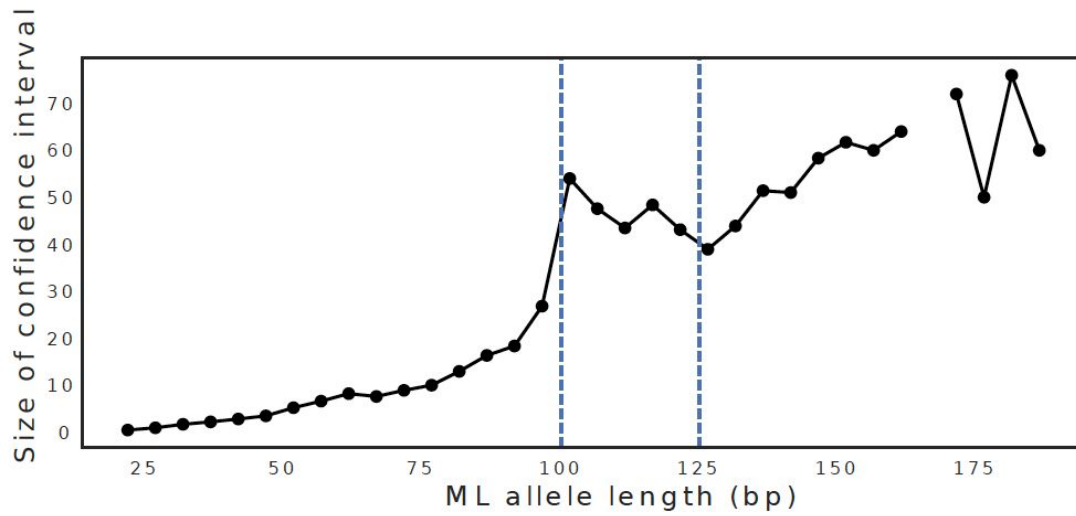

**Confidence interval size as a function of allele length in NA12878.** The x-axis gives the allele length (binned at bp intervals) and the y-axis gives the mean size of the confidence intervals for all alleles with maximum likelihood lengths in that range. Blue dashed lines show the read length (101bp) and 126bp. TRs with alleles called in this range slightly above the read length give less precise allele length estimates.

## Supplementary Figure 13

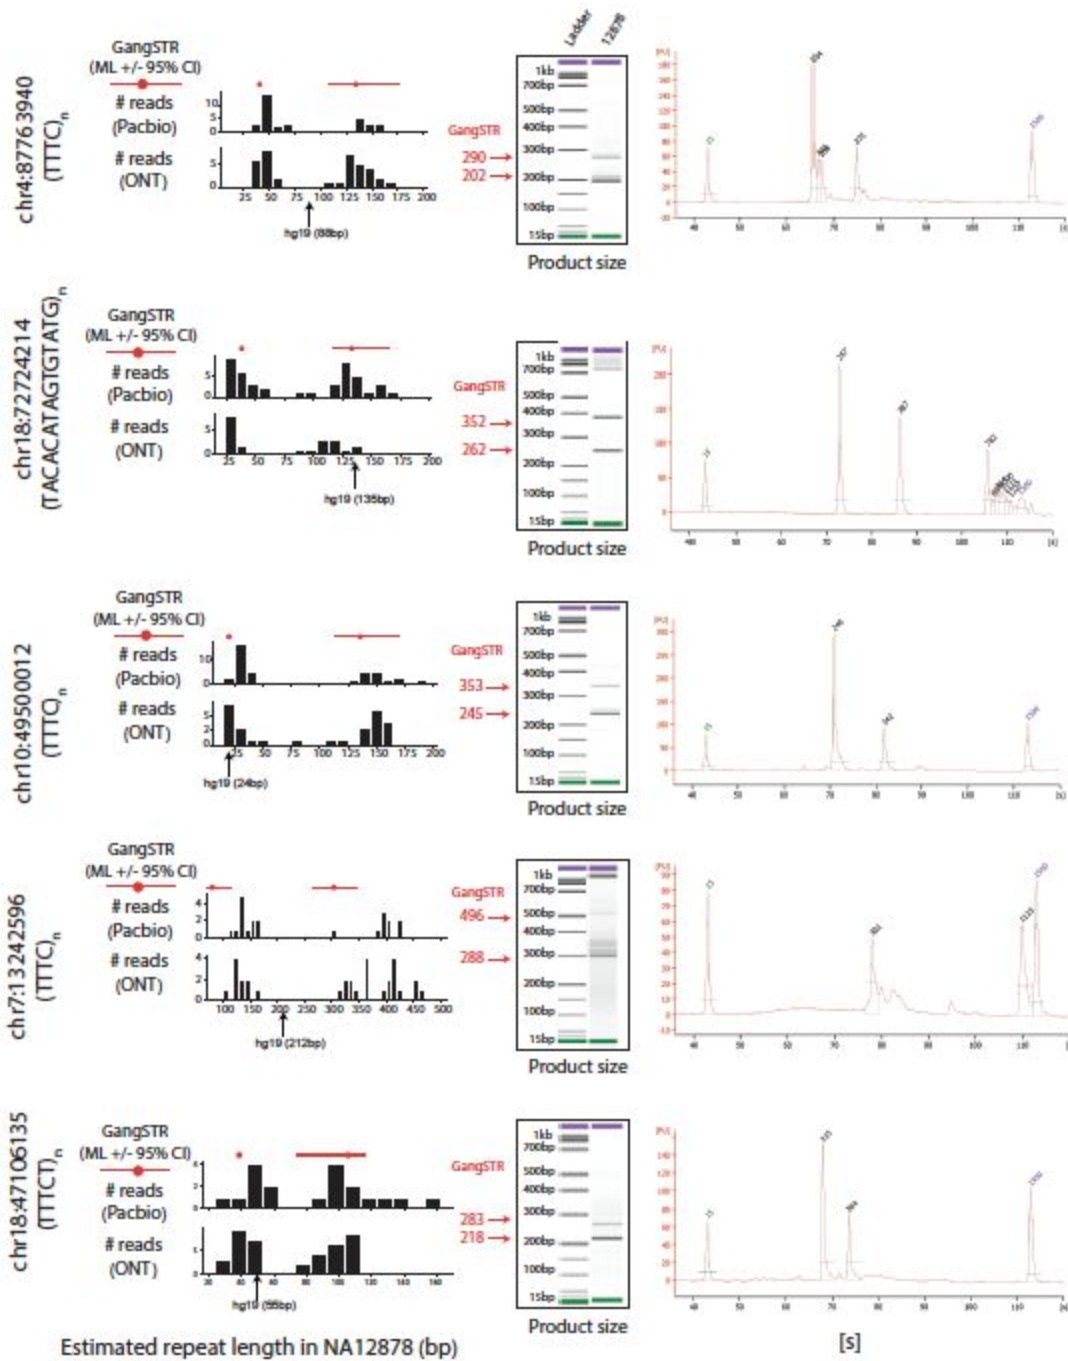

**Validation of long TR genotypes in NA12878.** For each of the five loci shown, left plots compare GangSTR genotypes to those predicted by long reads. Red dots give the maximum likelihood repeat lengths predicted by GangSTR and red lines give the 95% confidence intervals for each allele. Black histograms give the distribution of repeat lengths supported by PacBio (top) and ONT (bottom) reads. The black arrow denotes the length in hg19. The middle plots show PCR product sizes for each locus as estimated using capillary electrophoresis. Left bands



show the ladder and right bands show product sizes in NA12878. Green and purple bands show the lower and upper limits of the ladder, respectively. Red arrows and numbers give product sizes expected for the two alleles called by GangSTR. Right plots give capillary electrophoresis traces. The x-axis shows seconds and y-axis shows arbitrary fluorescent units. Peaks are annotated with estimated product sizes.

## Supplementary Figure 14

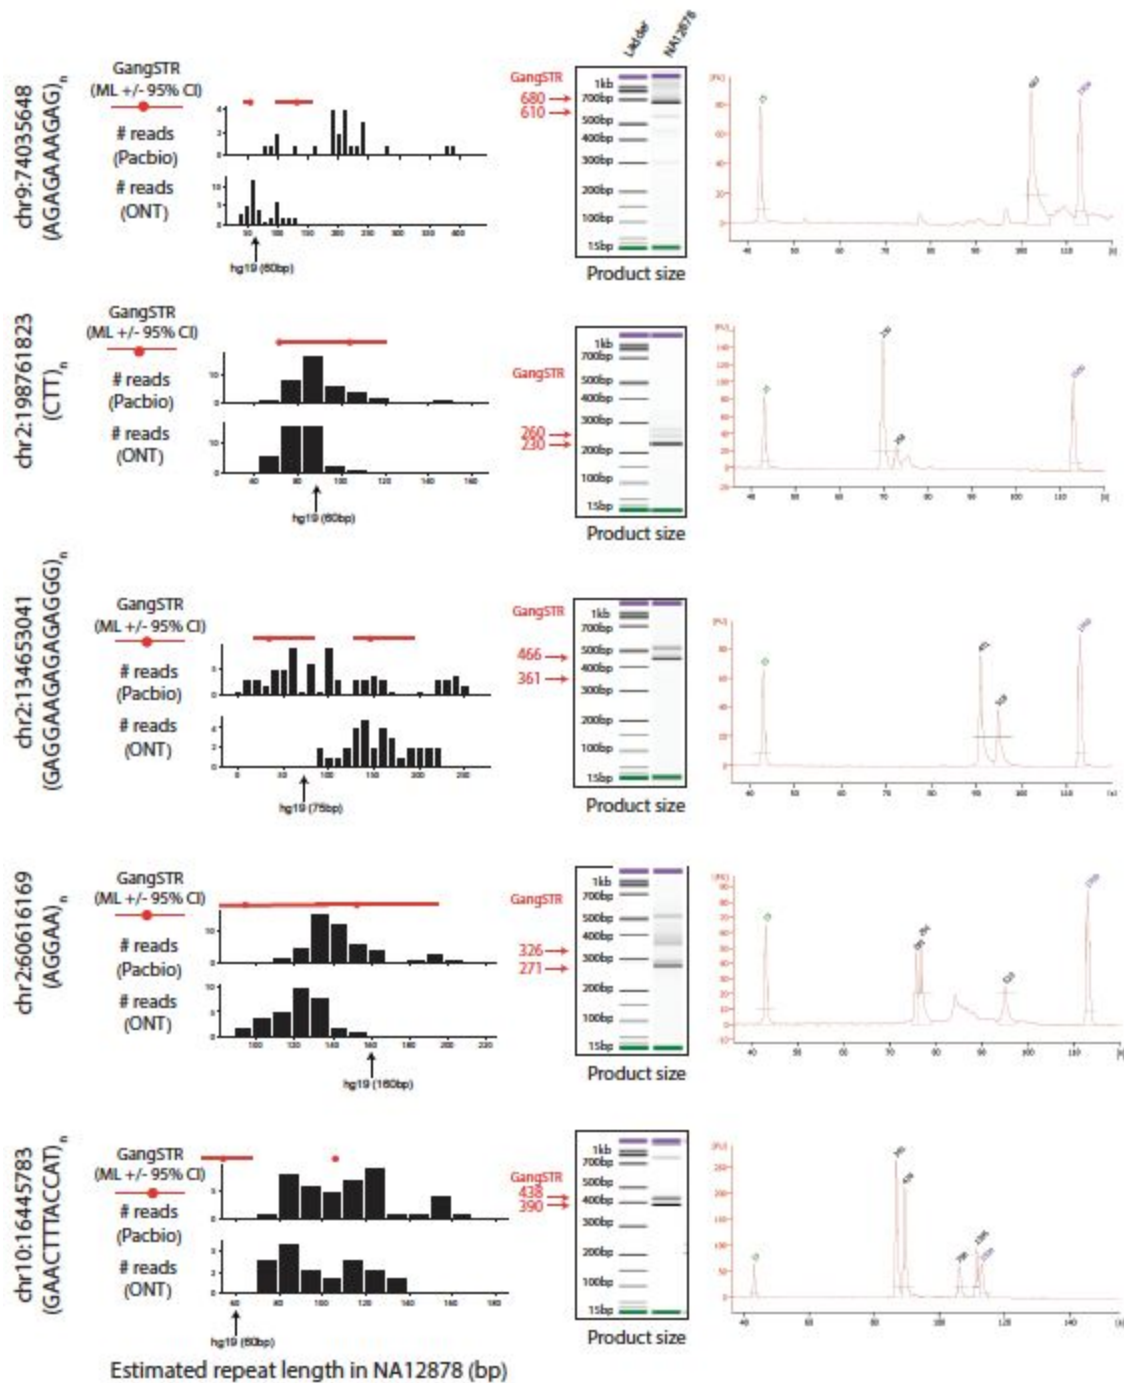

**Example repeats with discordant lengths across long read technologies in NA12878.** For each of the five loci shown, left plots compare GangSTR genotypes to those predicted by long reads. Red dots give the maximum likelihood repeat lengths predicted by GangSTR and red lines give the 95% confidence intervals for each allele. Black histograms give the distribution of repeat lengths supported by PacBio (top) and ONT (bottom) reads. The black arrow denotes the length in hg19. The middle plots show PCR product sizes for each locus as estimated using

capillary electrophoresis. Left bands show the ladder and right bands show product sizes in NA12878. Green and purple bands show the lower and upper limits of the ladder, respectively. Red arrows and numbers give product sizes expected for the two alleles called by GangSTR. Right plots give capillary electrophoresis traces. The x-axis shows seconds and y-axis shows arbitrary fluorescent units. Peaks are annotated with estimated product sizes.

## Supplementary Tables

**Supplementary Table 1: Target pathogenic repeats used in benchmarking experiments.**

| Abbreviation | Disease                   | Gene           | Motif | Repeat location                                                      | Pathogenic cutoff |
|--------------|---------------------------|----------------|-------|----------------------------------------------------------------------|-------------------|
| <b>SCA1</b>  | Spinocerebellar ataxia 1  | <i>ATXN1</i>   | CAG   | chr6:16327636–16327722 (hg38)<br>chr6:16327867-16327953 (hg19)       | 39                |
| <b>SCA2</b>  | Spinocerebellar ataxia 2  | <i>ATXN2</i>   | CAG   | chr12:111598951–111599019 (hg38)<br>chr12:112036755-112036823 (hg19) | 33                |
| <b>SCA3</b>  | Spinocerebellar ataxia 3  | <i>ATXN3</i>   | CAG   | chr14:92071011–92071034 (hg38)<br>chr14:92537355-92537378 (hg19)     | 60                |
| <b>SCA6</b>  | Spinocerebellar ataxia 6  | <i>CACNA1A</i> | CAG   | chr19:13207859–13207897 (hg38)<br>chr19:13318673-13318711 (hg19)     | 20                |
| <b>SCA7</b>  | Spinocerebellar ataxia 7  | <i>ATXN7</i>   | CAG   | chr3:63912686–63912715 (hg38)<br>chr3:63898362-63898391 (hg19)       | 34                |
| <b>SCA8</b>  | Spinocerebellar ataxia 8  | <i>ATXN8OS</i> | CTG   | chr13:70139384–70139428 (hg38)<br>chr13:70713516-70713560 (hg19)     | 80                |
| <b>SCA12</b> | Spinocerebellar ataxia 12 | <i>PPP2R2B</i> | CAG   | chr5:146878729–146878758 (hg38)<br>chr5:146258292-146258321 (hg19)   | 51                |
| <b>SCA17</b> | Spinocerebellar ataxia 17 | <i>TBP</i>     | CAG   | chr6:170561908–170562021 (hg38)<br>chr6:170870996-170871109 (hg19)   | 43                |
| <b>HTT</b>   | Huntington's Disease      | <i>HTT</i>     | CAG   | chr4:3074877–3074933 (hg38)<br>chr4:3076604-3076660 (hg19)           | 40                |
| <b>DM1</b>   | Myotonic Dystrophy 1      | <i>DMPK</i>    | CTG   | chr19:45770205–45770264 (hg38)<br>chr19:46273463-46273522 (hg19)     | 50                |

**Table modified from Tang *et al.* Table 1.** Repeat locations are given for both hg19 and hg38 genomic coordinates.

**Supplementary Table 2: Computational performance of repeat expansion tools.**

| <b>Tool</b>                     | <b>Average CPU time</b> |
|---------------------------------|-------------------------|
| <b>GangSTR - 100 bootstraps</b> | 13.2s                   |
| <b>GangSTR - no bootstrap</b>   | 10.2s                   |
| <b>Tredparse</b>                | 170.4s                  |
| <b>ExpansionHunter (no cov)</b> | 12.8s                   |
| <b>ExpnasionHunter</b>          | 652.0s                  |

All timing experiments were run on a 64 bit machine running CentOS 7.4.1708 using a single Intel(R) Xeon(R) CPU E5-2660 v4 @ 2.00GHz processor. All tools were run on the 10 loci shown in **Supplementary Table 1**.

**Supplementary Table 3: Summary of long repeat alleles identified in NA12878**

See GangSTR\_SuppTable3.xlsx

**Supplementary Table 4: Motif enrichment for expanded repeats in NA12878**

| <b>Motif</b>       | <b># Expansions in NA12878</b> | <b># in hg19</b> | <b>P-value</b> |
|--------------------|--------------------------------|------------------|----------------|
| <b>AAAG/CTTT</b>   | 87                             | 11,669           | 1.67e-94       |
| <b>AAAGG/CCTTT</b> | 26                             | 499              | 2.16e-48       |
| <b>AAAAG/CTTTT</b> | 8                              | 4,168            | 8.11e-05       |
| <b>AAAAT/ATTTT</b> | 7                              | 8,939            | 2.89e-02       |
| <b>AAG/CTT</b>     | 7                              | 11,272           | 7.92e-02       |

P-values were computed using one-sided Fisher's exact test.

**Supplementary Table 5: Experimental validation of long TRs in NA12878**

| Locus (hg19)             | F primer                    | R primer                        | Hg19 size (bp) | Predicted sizes (bp) | Observed sizes (bp) | Long reads |
|--------------------------|-----------------------------|---------------------------------|----------------|----------------------|---------------------|------------|
| chr4:87763940-87764027   | AGCTGTCCTGAGTTGCAT<br>CA    | GACTGAGGCAGGAG<br>AAATGC        | 242            | 202/290              | 194/275             | Y          |
| chr18:72724214-72724348  | GGGCACCTGTGCT<br>GAAAT      | ATGAGTCGTTGGCA<br>AAGTGT        | 352            | 262/352              | 257/387             | Y          |
| chr10:49500012-49500035  | CCCCTCACCTCTTG<br>TCTTTG    | GCTACTTGGGAGCT<br>GAGGTG        | 241            | 245/353              | 240/342             | Y          |
| chr7:13242596-13242807   | GCATTTTCCTGATG<br>GCTAAA    | TTAGCCGGGTGTGG<br>TAGC          | 400            | 288/496              | 302/1,133           | Y          |
| chr18:47106135-47106189  | CCCTGATGCTCAGT<br>CTTTCC    | CCTGGGGAACAAGA<br>GTGAAA        | 228            | 218/283              | 215/264             | Y          |
| chr9:74035648-74035707   | GGCAAGGAGAAAC<br>AGATACCA   | TTGCTGCAAAGGAC<br>GTGA          | 600            | 610/680              | 667                 | N          |
| chr2:198761823-198761912 | CCATAATGATACCT<br>TTGGGGATA | TCCTCTATTTGAGCA<br>CAACTAGATACA | 245            | 230/260              | 230/258             | N          |
| chr2:134653041-134653115 | TTCCCTAGGGGAAG<br>AGGAAG    | CATGGTCACCGATA<br>AGACCTTT      | 391            | 361/466              | 451/518             | N          |
| chr2:60616169-60616328   | CTGGGCCACAGAAT<br>GAGACT    | TTTACAGGTTGGCC<br>ACACAA        | 331            | 271/326              | 281/291             | N          |
| chr10:16445783-16445842  | TGCCAATAAGTAT<br>GAGAAGAACA | AAGTTCAAAGGCC<br>AGACCA         | 390            | 390/438              | 391/428             | N          |
| chr17:59583055-59583146  | AAGACGGCAGTAAG<br>CCAGAA    | GGAGTGAACACGAG<br>ACAGCA        | 250            | 218/266              | 205/235             | N          |

Predicted sizes give the maximum likelihood estimate from GangSTR for each allele. Observed sizes give the top two peaks observed in capillary electrophoresis. Note, traces were often messy and showed evidence for more than two alleles. See **Supplementary Figures 13 and 14** for raw capillary data. Long reads column is “Y” if GangSTR calls were concordant with both Pacbio and ONT. “N” indicates that long reads were discordant either with each other or with GangSTR calls. We chose five loci concordant with long read data for validation and six loci with inconclusive results using long reads.

**Supplementary Table 6: Summary of GangSTR genotypes in 150 genomes**

| Cohort                   | # Loci genotyped | # loci heterozygous for allele >100bp | # loci homozygous for allele >100bp | # loci heterozygous for allele >150bp | # loci homozygous for allele >150bp |
|--------------------------|------------------|---------------------------------------|-------------------------------------|---------------------------------------|-------------------------------------|
| <b>African (n=50)</b>    | 513,998          | 44.4                                  | 7.9                                 | 5.5                                   | 0.76                                |
| <b>East Asian (n=50)</b> | 515,494          | 44.2                                  | 10.5                                | 5.5                                   | 0.72                                |
| <b>European (n=50)</b>   | 516,662          | 39.6                                  | 9.3                                 | 4.7                                   | 0.72                                |

Each value gives the mean across all individuals analyzed.



**Supplementary Table 7: Long repeats with discordant allele frequency spectra across populations**

| <b>STR Locus (hg19)</b>  | <b>Motif</b>        | <b>ANOVA p-value</b> | <b>Annotation</b>           | <b>Mean length (EUR)</b> | <b>Mean length (AFR)</b> | <b>Mean length (EAS)</b> |
|--------------------------|---------------------|----------------------|-----------------------------|--------------------------|--------------------------|--------------------------|
| chr21:36720944-36721033  | AATAG               | 1.8e-13              | Intron ( <i>RUNX1</i> )     | 22.07                    | 16.21                    | 24.10                    |
| chr2:158410717-158410780 | AAAG                | 2.0e-12              | Intron ( <i>ACVR1C</i> )    | 18.07                    | 21.69                    | 24.48                    |
| chr5:17883973-17884024   | AAAG                | 4.3e-9               | Intron ( <i>BC028204</i> )  | 24.10                    | 15.77                    | 21.50                    |
| chr2:119670373-119670420 | AAAG                | 4.3e-7               | Intergenic                  | 19.30                    | 14.28                    | 14.25                    |
| chr14:56113179-56113263  | AAAGG               | 2.9e-7               | Intron ( <i>KTN1</i> )      | 18.22                    | 14.72                    | 18.34                    |
| chr7:26995285-26995349   | AAAGG               | 4.2e-6               | Intron ( <i>SKAP2</i> )     | 18.60                    | 15.47                    | 18.73                    |
| chr3:163246863-163246934 | AAAG                | 7.4e-7               | Intergenic                  | 20.86                    | 19.97                    | 27.06                    |
| chr2:88703915-88704010   | AAAG                | 1.2e-6               | Intergenic                  | 24.69                    | 21.85                    | 26.52                    |
| chr17:32835083-32835187  | AAAGG               | 1.8e-6               | Intergenic                  | 19.67                    | 16.93                    | 18.31                    |
| chr4:54751299-54751364   | AAG                 | 2.8e-6               | Intron ( <i>PDGFRA</i> )    | 28.56                    | 18.61                    | 27.75                    |
| chr12:80408618-80408697  | AAAGG               | 7.2e-6               | Intergenic                  | 15.81                    | 17.72                    | 16.76                    |
| chr7:113785487-113785551 | AAAAG               | 1.1e-5               | Intron ( <i>FOXP2</i> )     | 13.83                    | 14.61                    | 10.25                    |
| chr18:70874677-70874735  | AAAACATAT<br>ATATGT | 1.8e-5               | Intron ( <i>LOC400655</i> ) | 3.61                     | 6.44                     | 3.42                     |
| chr1:11491766-11491837   | AAAG                | 2.2e-5               | Intergenic                  | 20.74                    | 16.67                    | 20.11                    |
| chr3:102856807-102856876 | AAAAT               | 2.8e-5               | Intergenic                  | 17.29                    | 13.45                    | 18.95                    |
| chr22:23333498-23333585  | AGAGAGGG            | 3.1e-5               | Intergenic                  | 10.04                    | 9.63                     | 11.43                    |
| chr2:127327339-127327466 | AAAG                | 4.3e-5               | Intergenic                  | 24.82                    | 26.95                    | 29.03                    |

|                           |                     |        |                                |       |       |       |
|---------------------------|---------------------|--------|--------------------------------|-------|-------|-------|
| chr6:21965536-21965640    | AAGAAGGA<br>GGAGGGG | 5.7e-5 | Intron<br>( <i>LINC00340</i> ) | 3.57  | 4.65  | 5.00  |
| chr10:118332630-118332725 | AAAG                | 6.6e-5 | Intergenic                     | 23.32 | 22.86 | 29.56 |
| chr13:32333513-32333580   | AAAG                | 6.7e-5 | Intron ( <i>FXFP2</i> )        | 23.33 | 23.82 | 18.50 |

Lengths are given in multiples of the repeat unit.
